# Supplementary material
Source: PubMed Central journal article supplement (PMC2991635)
Supplement: NIHMS229724-supplement-Supp_Fig_s1-s3___Table_s1.pdf [file NIHMS229724-supplement-Supp_Fig_s1-s3___Table_s1.pdf]

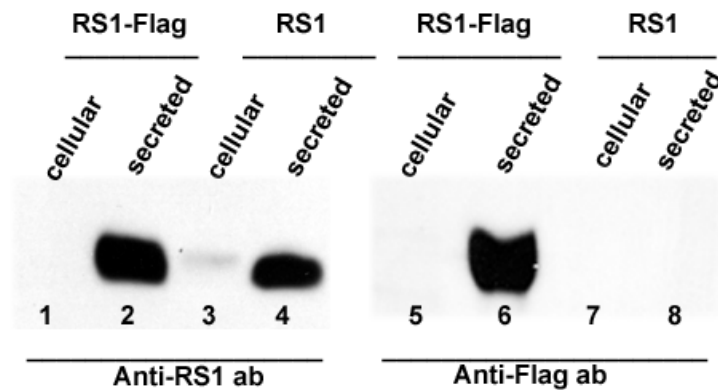

**Supp. Figure S1.** Expression analysis of RS1 in secreted and cellular fractions derived from COS-7 cells transiently transfected with either *RS1* or *RS1*-Flag cDNA constructs. At 72 h post-transfection cultures were harvested, and cellular and secreted fractions were analyzed for RS1 protein by immunoblotting using anti-RS1 rabbit polyclonal antibody raised against the N terminus amino-acid residues 24–37 of RS1 or with an anti-Flag monoclonal antibody (Stratagene). Results indicate that the addition of Flag epitope to RS1 C-terminus did not alter the secretory nature of RS1, and both RS1 (lane 4) and RS1-Flag (lane 2) were secreted into the medium. While anti-RS1 antibody detected both forms of RS1 (RS1-Flag and RS1; lanes 2, 4) anti-Flag antibody selectively identified only the epitope tagged RS1-Flag (lane 6), but not RS1 (lanes 7, 8). These findings confirm the specificity of the Flag antibody and utility of the epitope tag system in selective identification of a particular variant such as a Mut *RS1* in cells co-expressing both the WT and *RS1* mutants.

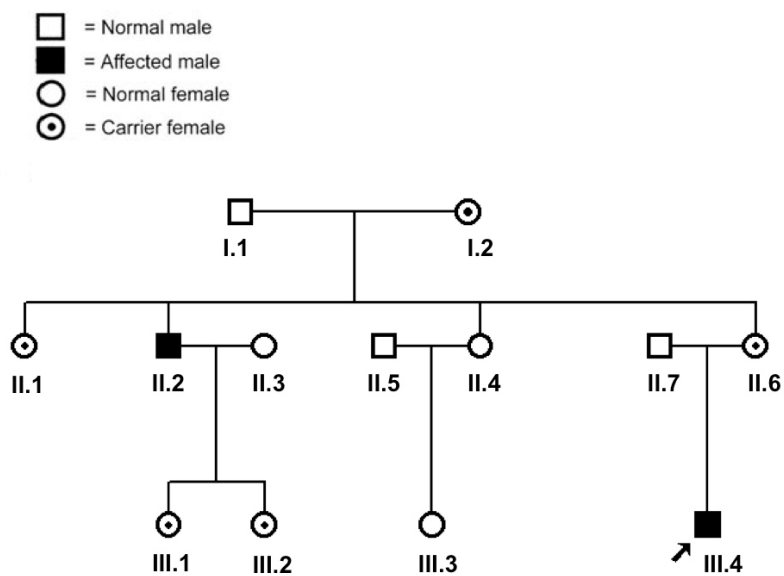

**Supp. Figure S2.** Pedigree of the XLRS family harboring the c.52G>A mutation of *RS1*. The proband is indicated by an arrow. All female carriers were genetically identified.

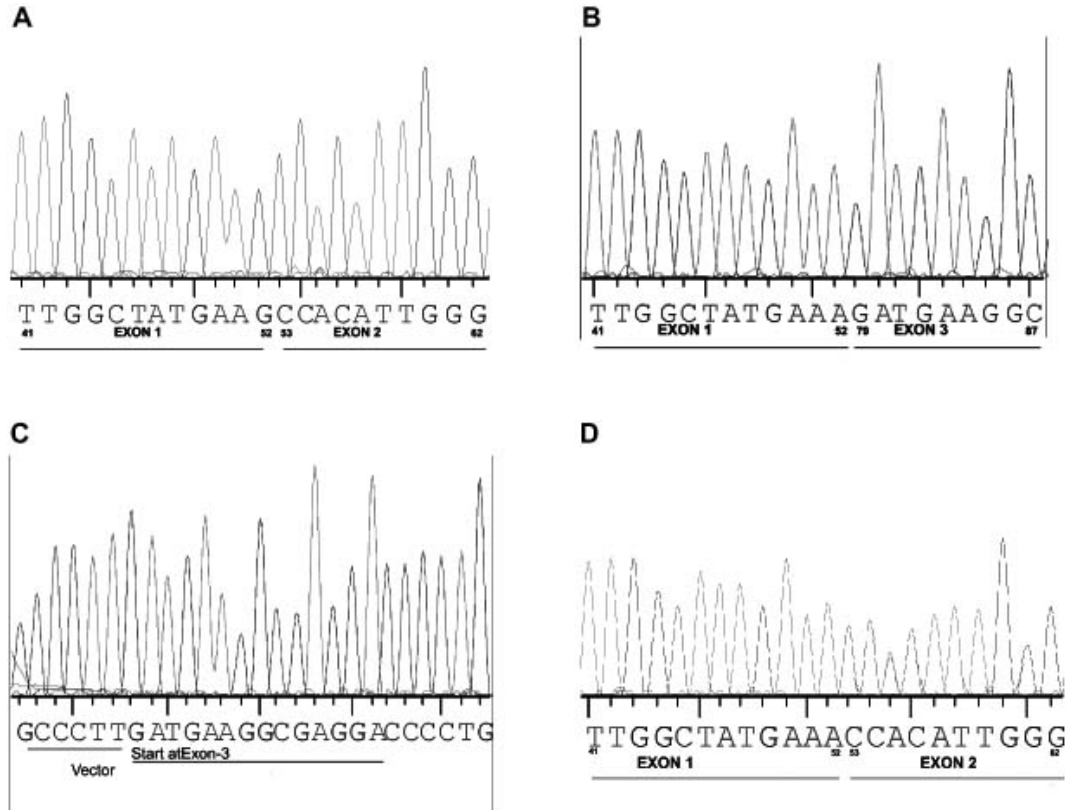

**Supp. Figure S3.** The c.52G>A mutation causes differential RNA splicing. Sequence traces of the subcloned full length RT-PCR products: full length RT-PCR products were purified and subcloned into Zero Blunt TOPO PCR vector. Plasmids were prepared from colonies and sequenced. (A) Sequence trace of WT control transcript showing normal splicing between exons 1 and 2 and (B–D) sequence traces of c.52G>A variant transcripts: B, exon-2 skipping; C, exons-1 and -2 skipping; D, normal splicing.

**Supp. Table S1. List of mutations found in XLR5 patients with primer sequences used in *RS1* cloning and mutagenesis**

| <u>DNA Level</u> | <u>Protein Level</u> | <u>Sense Primers Used in mutagenesis</u> **             |
|------------------|----------------------|---------------------------------------------------------|
| 1. c.1A>T        | p. Met1Leu           | 5'-Tgtcacgcaagatagaaggctt-3'                            |
| 2. c.35T>A       | p.Leu12His           | 5'-gaaggcttttgtattacAAtctcttggtatgaagccaca-3'           |
| 3. c.37C>T       | p.Leu13Phe           | 5'-gaaggcttttgtattactTtctttggctatgaagccaca-3'           |
| 4. c.38T>C       | p.Leu13Pro           | 5'-gaaggcttttgtattactcCctttggctatgaagccaca-3'           |
| 5. c.214G>A      | p. Glu 72 Lys        | 5'-cccatatcacaagcctctgggttcAagtcaggggaggtcacaccggac-3'  |
| 6. c.276G>C      | p. Trp 92 Cys        | 5'-ccggagcagatgtgggctgCtattctctggactgcaaac-3'           |
| 7. c.286G>C      | p.Trp 96Cys          | 5'-gtggctgtattctctgCactgcaacaaggcccggtcaac-3'           |
| 8. c.304C>T      | p.Arg102Trp          | 5'-tctctgtgactgcaacaaggccTggctcaacagtaaggctttgggt-3'    |
| 9. c.535A>G      | p.Asn179Asp          | 5'-aacaaccgggtcttctatggcGactcggaccgcacctccacggtt-3'     |
| 10. c.574C>T     | p.Pro192Ser          | 5'-tccacggttcagaacctgctgctgTccccatcatctcccgttcatccgc-3' |
| 11. c.598C>T     | p.Arg200Cys          | 5'-ccatcatctcccgttctcTgctcatccgctgggctggcacg-3'         |
| 12. c.673C>T     | p.Arg213Trp          | 5'-ctgggctggcacgtccgattgccatTggatggagctgctggagtcg-3'    |

## List of Primers used in cloning

|                                                   |                                                             |
|---------------------------------------------------|-------------------------------------------------------------|
| 13. Not1 primer (sense)                           | 5' -ggc ggc cgc gcc acc atg tca cgc aag ata gaa ggc tt-3'   |
| 14. Xho1 primer (antisense)                       | 5'-ctcgag tca ggc aca ctt gct gac gcac-3'                   |
| 15. Xho1 primer<br>(antisense without stop codon) | 5'-ctcgag ggc aca ctt gct gac gcac-3')                      |
| 16. Internal Sense (nt 206–228)                   | 5'-tgggttcgagtcaggggaggtc-3'                                |
| 17. Internal Antisense (nt 553–531)               | 5'-gat gaa ggc ga g gac ccc tgg t-3'                        |
| 18. Minigene: Not1-EcoR1 sense*                   | 5'-gag gcg gcc gcg cca cca tgt cac gca aga tag aag gc tt-3' |
| 19. Minigene: EcoR-Not1 antisense*                | 5'-acg aat tct tat tag att cca gtg gta ctg ggt at-3'        |
| 20. Minigene: EcoR-BamH1sense+                    | 5'-agg aat tca ctg cta ggg tta aat gaa agg gaa ag-3'        |
| 21. Minigene: EcoR-BamH1antisense+                | 5'-gtg gat cct cgc ctt cat cct gca-3'                       |

\*\* Mutant residues are shown in upper case. *RS1* gene: The numbering follows GenBank NCBI Reference Sequence: NM\_000330.3. Nucleotide 1 is A of the ATG initiation codon (CDS 36–710). *RS1* protein: NP\_000321.1.

Primers-18-20: PCR amplification of human genomic DNA from a normal control with primers based in exon1, intron1, exon 2, intron 2 and exon 3. \*0.56 kb genomic fragment containing the exon 1 and the first 507 bp of intron 1 with Not1 and EcoR1 flanking sites; +1.7 kb second genomic fragment containing 3' sequences of intron 1 (the terminal 764 bp) in frame with exon 2, intron 2, and the first 17 nucleotides of exon 3 with EcoR1 and BamH1 flanking sites.
